# Supplementary material for: Technical note: Do different projections matter for the Budyko framework?
Source: Copernicus journal article supplement (doi:10.5194/hess-26-4575-2022), 2022-09-14
Supplement: Supplementary file 1 [file hess-26-4575-2022-supplement.zip]

# Supplement S1

July 12, 2022

## 1 Budyko Equations

$$E = E_p P (E_p^n + P^n)^{-\frac{1}{n}}$$

To express  $E/E_p$  as a function of  $P/E_p$ , we will divide both sides by  $E_p$ , then again divide the nominator and denominator of the right hand side by  $E_p$  and substitute  $P/E_p$  for  $P/E_p$  to obtain:

$$E/E_p = P/E_p (P/E_p^n + 1)^{-\frac{1}{n}}$$

Proof that multiplication of eq\_EEp\_Rod1 by  $E_p$  recovers eq\_E\_Rod1:

**True**

Similarly, to express  $E/P$  as a function of  $E_p/P$ , we will divide both sides of eq\_E\_Rod1 by  $P$ , then again divide the nominator and denominator of the right hand side by  $P$  and substitute  $E_p/P$  for  $E_p/P$  to obtain:

$$E/P = E_p/P (E_p/P^n + 1)^{-\frac{1}{n}}$$

**True**

$$E = E_p + P - (E_p^\omega + P^\omega)^{\frac{1}{\omega}}$$

$$E/P = E_p/P - (E_p/P^\omega + 1)^{\frac{1}{\omega}} + 1$$

**True**

$$E/E_p = P/E_p - (P/E_p^\omega + 1)^{\frac{1}{\omega}} + 1$$

**True**
