# Supplementary material for: Technical note: Do different projections matter for the Budyko framework?
Source: Copernicus journal article supplement (doi:10.5194/hess-26-4575-2022), 2022-09-14
Supplement: Supplementary file 2 [file hess-26-4575-2022-supplement.zip]

Archive with 4 entries (3 files):
- supplement/
- supplement/S1_equations.pdf
- supplement/S2_random_samples.pdf
- hess-26-4575-2022-supplement-title-page.pdf
