# Supplementary material for: Technical note: Do different projections matter for the Budyko framework?
Source: Copernicus journal article supplement (doi:10.5194/hess-26-4575-2022), 2022-09-14
Supplement: Supplementary file 2 [file hess-26-4575-2022-supplement.zip › hess-26-4575-2022-supplement-title-page.pdf]

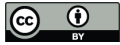

## *Supplement of*

# **Technical note: Do different projections matter for the Budyko framework?**

**Remko C. Nijzink and Stanislaus J. Schymanski**

*Correspondence to:* Remko C. Nijzink ([remko\\_nijzink@live.nl](mailto:remko_nijzink@live.nl))

- [hess-26-4575-2022-supplement-title-page.pdf](#)
- [supplement](#)
  - [S1\\_equations.pdf](#)
  - [S2\\_random\\_samples.pdf](#)

The copyright of individual parts of the supplement might differ from the article licence.
